# Supplementary material
Source: PubMed Central journal article supplement (PMC3848264)
Supplement: Supp_Table1.pdf [file Supp_Table1.pdf]

## Supplementary Data

SUPPLEMENTARY TABLE S1. Fmoc-AMINO ACIDS USED FOR SYNTHESIS OF OBOC LIBRARY LWH-01

| No. | X       | No. | X    | No. | X         |
|-----|---------|-----|------|-----|-----------|
| 1   | D-T     | 11  | V    | 21  | Phg       |
| 2   | D-Q     | 12  | I    | 22  | Chg       |
| 3   | D-E     | 13  | N    | 23  | Aad       |
| 4   | D-F     | 14  | D    | 24  | Ach       |
| 5   | D-3-Pal | 15  | H    | 25  | Bpa       |
| 6   | D-2-Thi | 16  | R    | 26  | HoCit     |
| 7   | G       | 17  | Y    | 27  | Tyr(Me)   |
| 8   | A       | 18  | W    | 28  | 2-Nal     |
| 9   | S       | 19  | Acpc | 29  | Phe(4-Me) |
| 10  | P       | 20  | Dpr  | 30  | Aic       |

Natural amino acids are designated by the standard single-letter code. D- indicates D-amino acids.

OBOC, one-bead-one compound; Aad,  $\alpha$ -aminohexanedioic acid; Ach, 1-amino-1-cyclohexane carboxylic acid; Acpc, 1-aminocyclopropane-1-carboxylic acid; Aic, 2-aminoindane-2-carboxylic acid; Bpa, 4-benzoylphenylalanine; Chg,  $\alpha$ -cyclohexylglycine; Dpr,  $\alpha$ - $\beta$ -diaminopropionic acid; HoCit, Homocitrulline; 2-Nal, 3-(2-Naphthyl)alanine; D-3-Pal, D-3-(3-pyridyl)alanine; Phe(4-Me), 4-methylphenylalanine; Phg, phenylglycine; D-2-Thi, D-3-(2-thienyl)alanine; Tyr(Me), O-methyltyrosine.
